# Supplementary material
Source: publisher figshare collection journal article supplement (https://karger.figshare.com/ndownloader/files/8715433)
Supplement: Supplementary file 1 [file 8715433]

**Appendix II: Interview guide**

**Questions to the healthcare professionals:**

- What is your opinion about the current project?
- What are your experiences so far?
- What are your experiences providing individualized attention?
- How do the residents respond to the individualized attention?
- Do the residents have a preference for particular activities? Do these preferences differ between residents?
- Have you talked to family members about their experiences with the intervention (positive/negative)?
- Which problems do you encounter? For example practical issues, problems with the work schedule, strengths and weaknesses of the intervention.
- Do you notice any overall (24/7) changes in the behavior of the residents (not during the intervention)?

Additional questions at the second post-test

- What is your opinion about the project (at the end of the project)?
- How do you think this project should be continued?

**Questions to the family members:**

- Are you familiar with the interventions focusing on individualized attention?
- What do you think of the implementation of this project?
- Did you attend a session in which the individualized attention was provided?
- Have you noticed any changes in behavior or quality of life of your family member? If so, which positive or negative changes have you noticed?
- Overall, does the additional individualized attention have an effect on your family member?
